# Supplementary material for: Translocation and Dissemination of Gut Bacteria after Severe Traumatic Brain Injury
Source: Microorganisms. 2022 Oct 21;10(10):2082. doi: 10.3390/microorganisms10102082 (PMC9611479; doi:10.3390/microorganisms10102082)
Supplement: Supplementary file 1 [file microorganisms-10-02082-s001.zip]

Archive with 4 entries (4 files):
- Figure S1.tif
- Figure S2.tif
- Figure S3.tif
- Supplementary Figure legends.pdf
